# Supplementary material for: A potent pan-sarbecovirus neutralizing antibody resilient to epitope diversification
Source: PubMed Central journal article supplement (PMC11645210; doi:10.1016/j.cell.2024.09.026), 2024-10-08

A

UltraAufoil grids (tilted 45°)

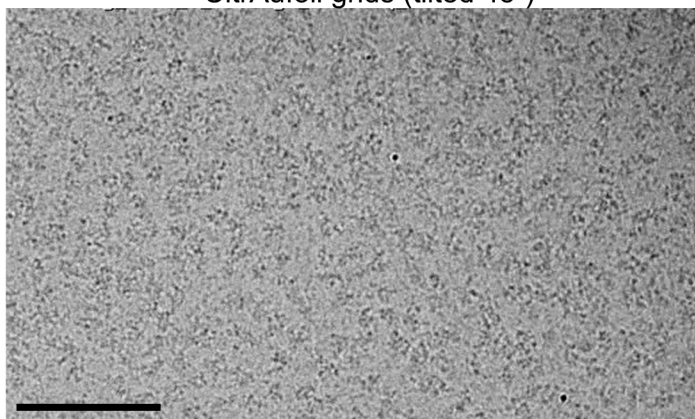

Ni/Ti grids (tilted 45°)

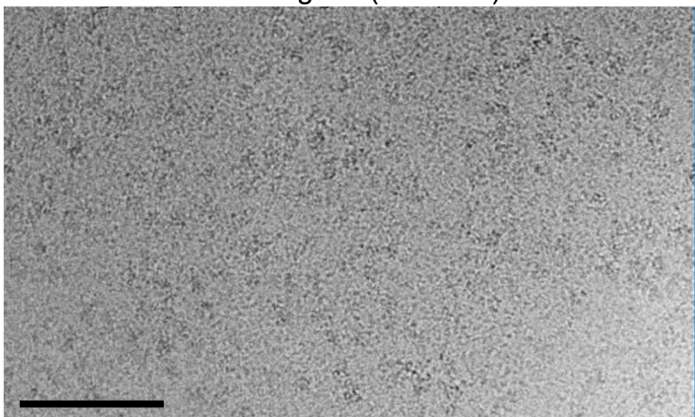

C-Flat covered with a thin layer of carbon (not tilted)

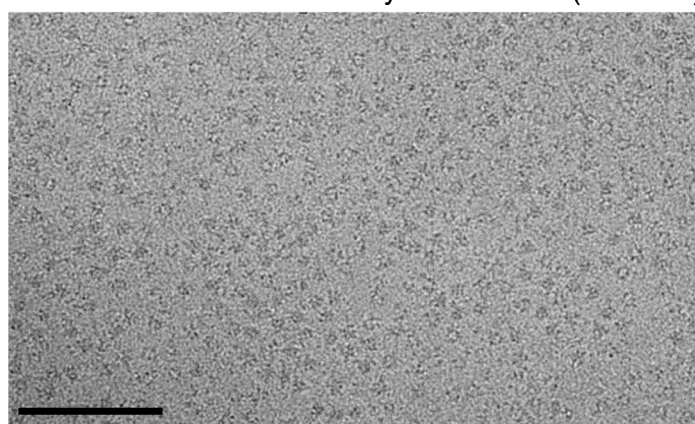

B

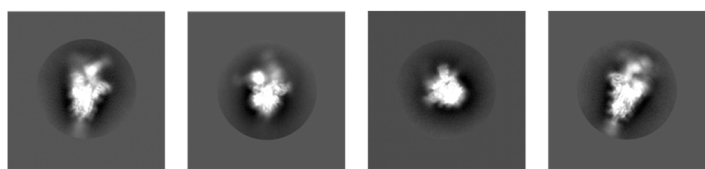

320 Å

C

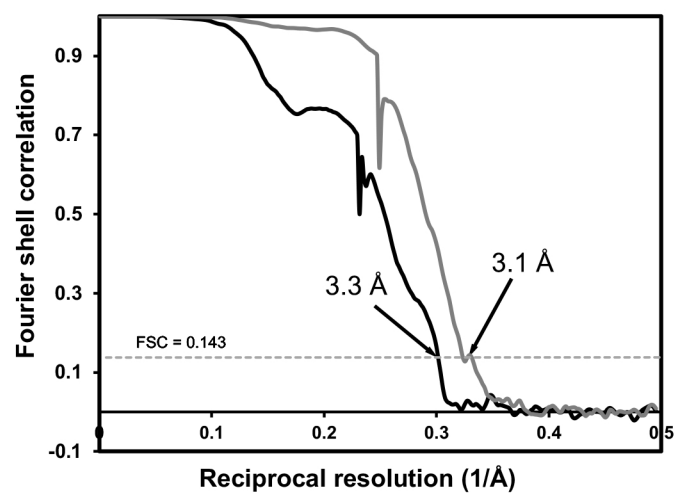

F

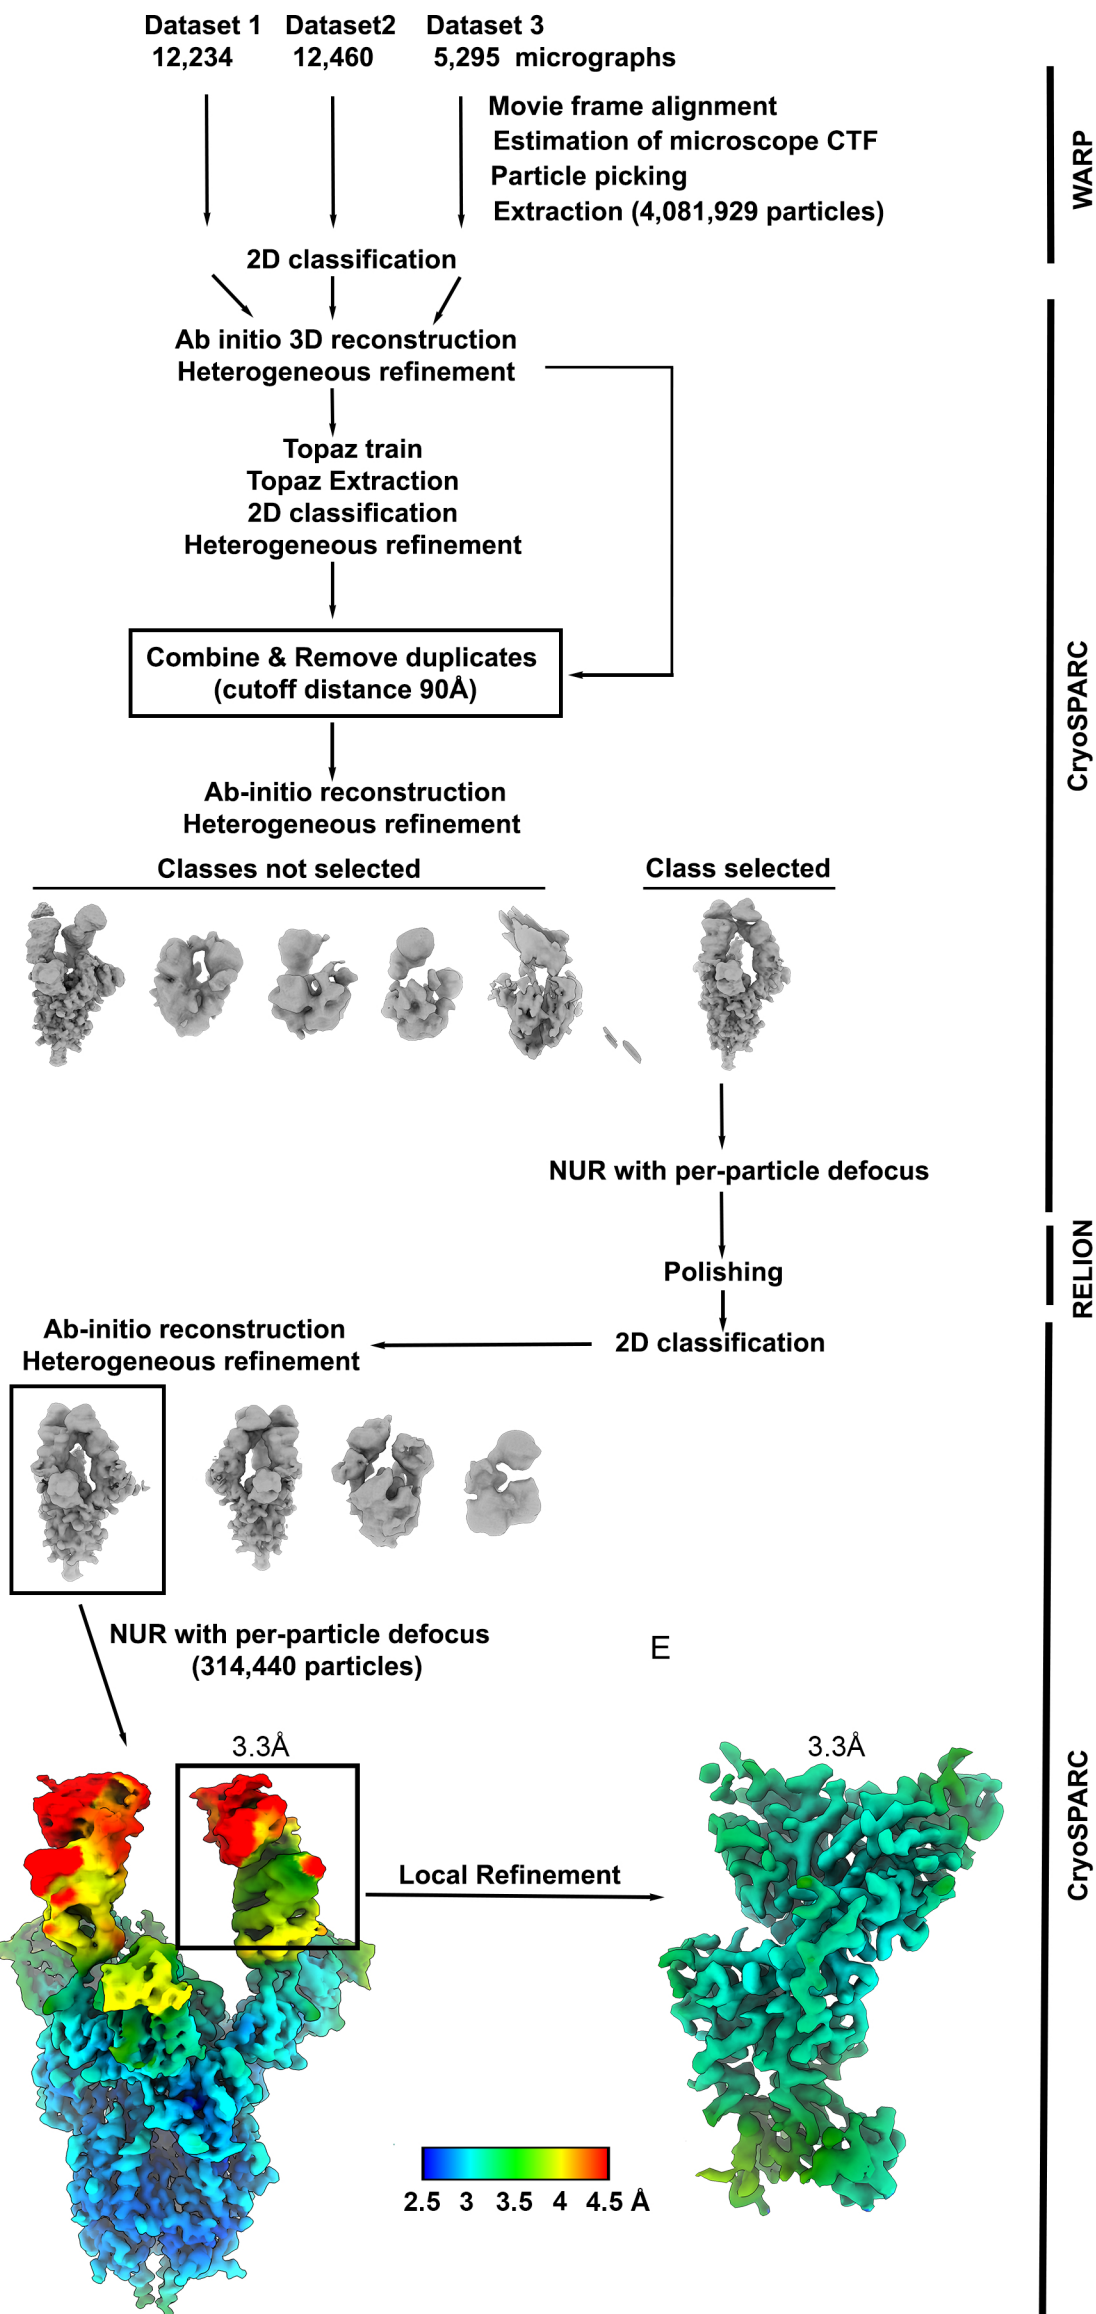

Supplement: NIHMS2027680-supplement-8.pdf [file NIHMS2027680-supplement-8.pdf]
