# Supplementary material for: A potent pan-sarbecovirus neutralizing antibody resilient to epitope diversification
Source: PubMed Central journal article supplement (PMC11645210; doi:10.1016/j.cell.2024.09.026), 2024-10-08

A

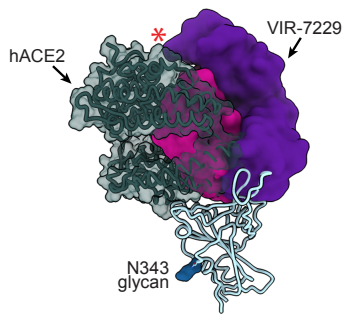

B

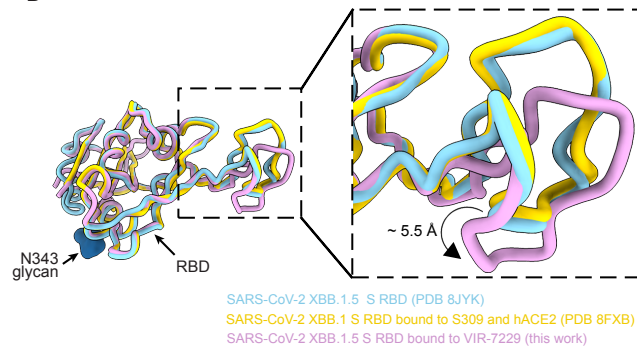

C

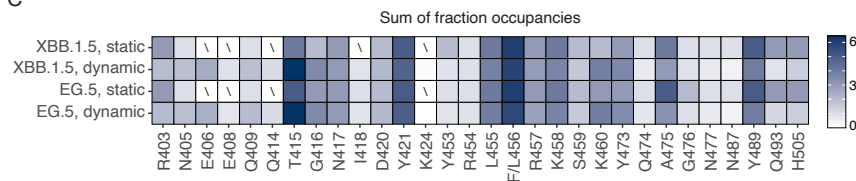

D

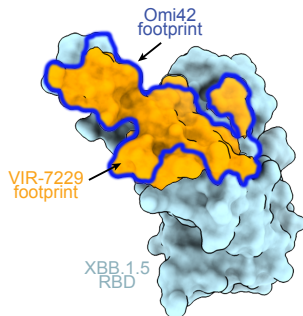

E

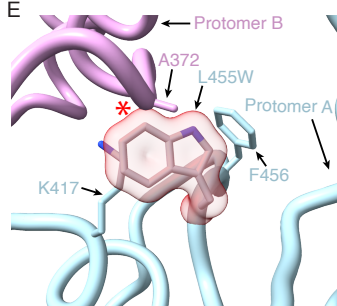

F

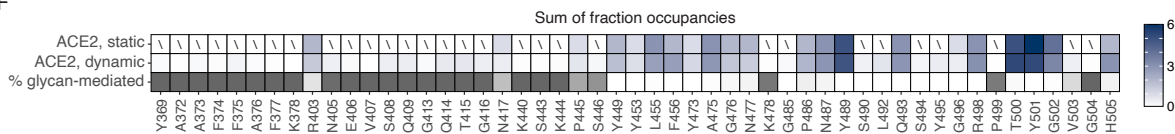

G

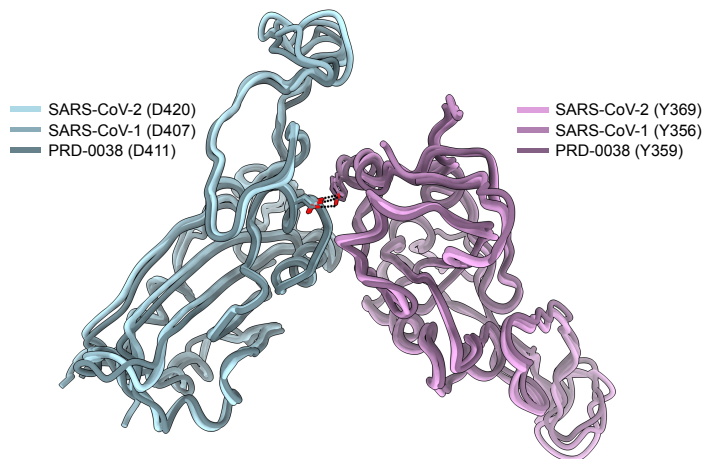

Supplement: NIHMS2027680-supplement-9.pdf [file NIHMS2027680-supplement-9.pdf]
