# Supplementary material for: A potent pan-sarbecovirus neutralizing antibody resilient to epitope diversification
Source: PubMed Central journal article supplement (PMC11645210; doi:10.1016/j.cell.2024.09.026), 2024-10-08
Supplement: NIHMS2027680-supplement-12.pdf [file NIHMS2027680-supplement-12.pdf]

**Table S1: CryoEM data collection and refinement statistics, related to Figures 3 and S3.**

|                                        | BA.2.86 S:VIR-7229<br>PDB 9AU2<br>EMD-43842 | BA.2.86 S:VIR-7229<br>Local refinement RBD:VH/VL<br>PDB 9ASD<br>EMD-43813 |
|----------------------------------------|---------------------------------------------|---------------------------------------------------------------------------|
| <b>Data collection and processing</b>  |                                             |                                                                           |
| Magnification                          | 105,000                                     | 105,000                                                                   |
| Voltage (kV)                           | 300                                         | 300                                                                       |
| Electron exposure (e-/Å <sup>2</sup> ) | 54                                          | 54                                                                        |
| Defocus range (µm)                     | 0.8-2.0                                     | 0.8-2.0                                                                   |
| Pixel size (Å)                         | 0.835                                       | 0.835                                                                     |
| Symmetry imposed                       | C1                                          | C1                                                                        |
| Initial particle images (no.)          | 4,081,929                                   | 4,081,929                                                                 |
| Final particle images (no.)            | 314,440                                     | 314,440                                                                   |
| Map resolution (Å)                     | 3.1                                         | 3.3                                                                       |
| FSC threshold                          | 0.143                                       | 0.143                                                                     |
| <b>Validation</b>                      |                                             |                                                                           |
| MolProbity score                       | 1.39                                        | 1.16                                                                      |
| Clashscore                             | 3.71                                        | 1.82                                                                      |
| Poor rotamers (%)                      | 1.16                                        | 0.45                                                                      |
| Ramachandran plot                      |                                             |                                                                           |
| Favored (%)                            | 96.93                                       | 96.58                                                                     |
| Allowed (%)                            | 2.98                                        | 3.42                                                                      |
| Disallowed (%)                         | 0.09                                        | 0                                                                         |

**Table S2: Crystallographic data collection and refinement statistics, related to Figures 3 and S4.**

|                                | EG.5 RBD/<br>VIR-7229/S2H97<br>PDB 9ATM | XBB.1.5 RBD/<br>VIR-7229/S309<br>PDB 9AU1 | BQ.1.1 RBD/<br>S2V29/S2H97<br>PDB 8S6M |
|--------------------------------|-----------------------------------------|-------------------------------------------|----------------------------------------|
| Wavelength                     | 1.195 Å                                 | 1.195 Å                                   | 1.00 Å                                 |
| Resolution range               | 46.78 - 1.9 (1.92 - 1.9)                | 44.98 - 2.41 (2.45 - 2.41)                | 47.35 - 1.67 (1.69 - 1.67)             |
| Space group                    | P 21 21 21                              | P 21 21 21                                | P 21 21 21                             |
| Unit cell                      | 48.728 149.698<br>167.078 90 90 90      | 73.726 112.525<br>170.314 90 90 90        | 148.175 48.099<br>166.526 90 90 90     |
| Total reflections              | 1277227 (33897)                         | 734265 (36747)                            | 941473 (16037)                         |
| Unique reflections             | 97295 (3168)                            | 55433 (2722)                              | 138930 (4582)                          |
| Multiplicity                   | 13.1 (10.7)                             | 13.3 (13.5)                               | 6.8 (3.5)                              |
| Completeness (%)               | 99.91 (99.69)                           | 99.88 (99.82)                             | 99.96 (100.00)                         |
| Mean I/sigma I                 | 12.8 (0.6)                              | 13.2 (0.5)                                | 15.5 (0.7)                             |
| Wilson B-factor                | 36.44                                   | 60.65                                     | 29.32                                  |
| Reflections used in refinement | 97295 (3017)                            | 55433 (2599)                              | 138930 (4349)                          |
| Reflections used for R-free    | 4870 (151)                              | 2757 (123)                                | 6987 (233)                             |
| R-work                         | 0.1939 (0.4012)                         | 0.2268 (0.4255)                           | 0.1839 (0.3597)                        |
| R-free                         | 0.2273 (0.4276)                         | 0.2574 (0.4369)                           | 0.2027 (0.3562)                        |
| CC(work)                       |                                         |                                           |                                        |
| CC(free)                       |                                         |                                           |                                        |
| Number of non-hydrogen atoms   | 8689                                    | 8190                                      | 8673                                   |
| macromolecules                 | 7977                                    | 8078                                      | 7844                                   |
| ligands                        | 36                                      | 42                                        | 59                                     |
| solvent                        | 676                                     | 70                                        | 770                                    |
| Protein residues               | 1070                                    | 1070                                      | 1067                                   |
|                                |                                         |                                           |                                        |
| RMS(bonds)                     | 0.007                                   | 0.008                                     | 0.006                                  |
| RMS(angles)                    | 0.87                                    | 0.96                                      | 0.87                                   |
| Ramachandran favored (%)       | 98.19                                   | 95.72                                     | 98.08                                  |
| Ramachandran allowed (%)       | 1.71                                    | 3.9                                       | 1.83                                   |
| Ramachandran outliers (%)      | 0.10                                    | 0.38                                      | 0.1                                    |
| Rotamer outliers (%)           | 0.47                                    | 2.36                                      | 0.73                                   |
| Clashscore                     | 2.18                                    | 3.89                                      | 1.9                                    |
| Average B-factor               | 53.96                                   | 76.42                                     | 45.76                                  |
| macromolecules                 | 54.16                                   | 76.40                                     | 45.78                                  |
| ligands                        | 70.71                                   | 87.15                                     | 68.20                                  |
| solvent                        | 50.70                                   | 71.79                                     | 43.77                                  |

**Table S3: Bioinformatic analysis of intra-individual SARS-CoV-2 genomic variability, related to Figures 6 and S6.**

| Nucleotide trimer change | Amino acid change | Genome-wide trimer mean mutation rate [%] | Standard error | Prevalence [%] of variant trimer at residue 455 in all backgrounds (GISAID) <sup>1</sup> | Prevalence [%] of variant trimer at residue 455 in F456L background (GISAID) <sup>1</sup> |
|--------------------------|-------------------|-------------------------------------------|----------------|------------------------------------------------------------------------------------------|-------------------------------------------------------------------------------------------|
| <b>TGT</b> > TTT         | L455F             | 0.0394                                    | 0.0086         | 0.40                                                                                     | 18.51                                                                                     |
| <b>TGC</b> > TTC         | L455F             | 0.0271                                    | 0.0053         | 0.25                                                                                     | 12.65                                                                                     |
| <b>TTG</b> > TCG         | L455S             | 0.0153                                    | 0.0014         | 0.31                                                                                     | 0.04                                                                                      |
| <b>TGT</b> > TCT         | L455F             | 0.0119                                    | 0.0014         | 0.02                                                                                     | 1.19                                                                                      |
| <b>TGC</b> > TCC         | L455F             | 0.0076                                    | 0.0015         | 4.1e-05                                                                                  | 2.1e-03                                                                                   |
| <b>ATT</b> > AGT         | L455V             | 0.0034                                    | 6.0e-04        | 3.4e-04                                                                                  | 6.9e-04                                                                                   |
| <b>TTG</b> > TGG         | L455W             | 0.0023                                    | 4.0e-04        | 3.7e-03                                                                                  | 0.16                                                                                      |
| <b>ATT</b> > AAT         | L455M             | 0.0021                                    | 4.0e-04        | 1.4e-04                                                                                  | 0                                                                                         |

The table depicts the in silico estimated mutation rate for all the nucleotide changes (in the context of their surrounding nucleotides) that can lead to an amino acid change at residue 455. Mean mutation rate and standard error are estimated from whole viral genomes of N=1763 samples (see details in Methods). Note, if the nucleotide change does not occur in the second nucleotide of the 455 amino acid codon, the trimer is not representative of the codon (e.g. for L455F, the variant occurs on the 3<sup>rd</sup> nucleotide of the 455 codon, the trimer therefore represents the last 2 nucleotides of the 455 codon and the first nucleotide of the 456 codon; for L455V and L455M, the variant occurs on the 1<sup>st</sup> nucleotide of the 455 codon, the trimers therefore represent the last nucleotide of the 454 codon and the first two nucleotides of the 455 codon). Nucleotides that are part of the wild-type Leucine codon are in bold. See also **Data S5**.

<sup>1</sup>GISAID prevalence is for sequences deposited up to January 17, 2024. As these results are based on the consensus sequences (as opposed to intra-individual variability), the result reflects viral fitness, immune pressure, transmission rate, as well as collection and submission biases (e.g. geographical).
